# Supplementary material for: Aptameric detection of quinine in reclaimed wastewater using a personal glucose meter
Source: Royal Society of Chemistry journal article supplement (doi:10.1039/c8ay00585k), 2018-01-01

## Aptameric detection of Quinine in reclaimed wastewater by using a personal glucose meter

Yong Qiu<sup>1</sup>, Chunmei Gu<sup>1,2\*</sup>, Bing Li<sup>3</sup>, Hanchang Shi<sup>1,4</sup>

<sup>1</sup> State Key Joint Laboratory of Environment Simulation and Pollution Control, School of Environment, Tsinghua University, Beijing 100084, China

<sup>2</sup> Department of Chemistry, Tsinghua University, Beijing 100084, China

<sup>3</sup> School of Energy and Environmental Engineering, University of Beijing Science & Technology, Beijing, 100083, China

<sup>4</sup> Division of Environment and Energy, Beijing Collaborative Innovation Research Institute, Beijing, 100094, China

Figure S1 Molecular structure of quinine.

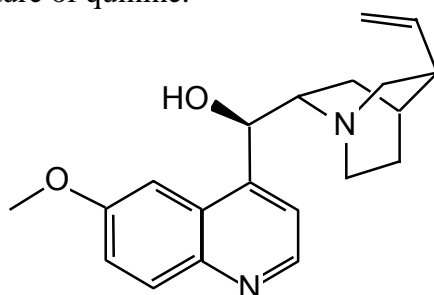

Figure S2 MBs-aptamer-invertase structure. The MBs represent the streptavidin functionalized magnetic beads. Bold letters represent the hybridization zones between aptamer and thiol-DNA. Invertase is linked to the complementary DNA by the reduced thiol group.

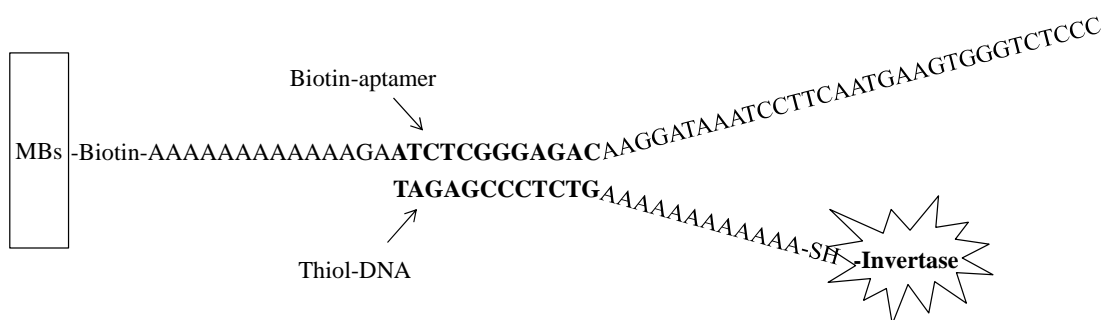

Figure S3 Non-denaturing PAGE (15%) of the thiol-DNA and invertase affinity. Band 1# is the DNA ladder, band 2# is the pure thiol-DNA, band 3# is the mixture of thiol-DNA and the invertase, band 4# is the conjugant of the thiol-DNA and the invertase.

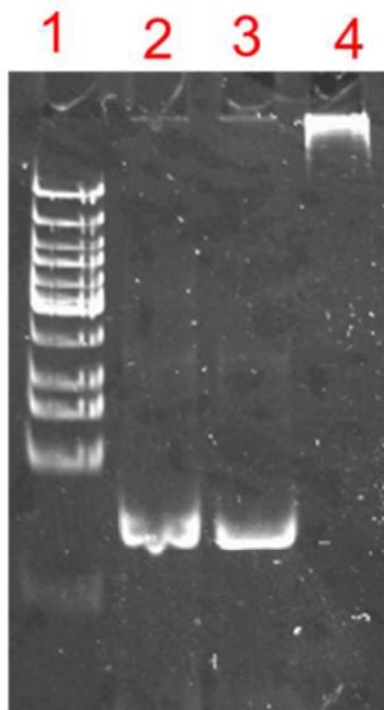

Supplement: c8ay00585k1.pdf [file c8ay00585k1.pdf]
